# Supplementary material for: Length effects on the dynamic process of cellular uptake and exocytosis of single-walled carbon nanotubes in murine macrophage cells
Source: PubMed Central journal article supplement (PMC5431871; doi:10.1038/s41598-017-01746-9), 2017-05-10
Supplement: 41598_2017_1746_MOESM1_ESM.pdf [file 41598_2017_1746_MOESM1_ESM.pdf]

# **Length effects on the dynamic process of cellular uptake and exocytosis of single-walled carbon nanotubes in murine macrophage cells**

Xuejing Cui,<sup>1,2</sup> Bin Wan,<sup>1,2,\*</sup> Yu Yang,<sup>1</sup> Xiaomin Ren,<sup>1</sup> Liang-Hong Guo<sup>1,2,3,\*</sup>

\*Corresponding authors: Dr. Bin Wan and Dr. Liang-Hong Guo

Email: binwan@rcees.ac.cn, LHGuo@rcees.ac.cn

First author: Xuejing Cui

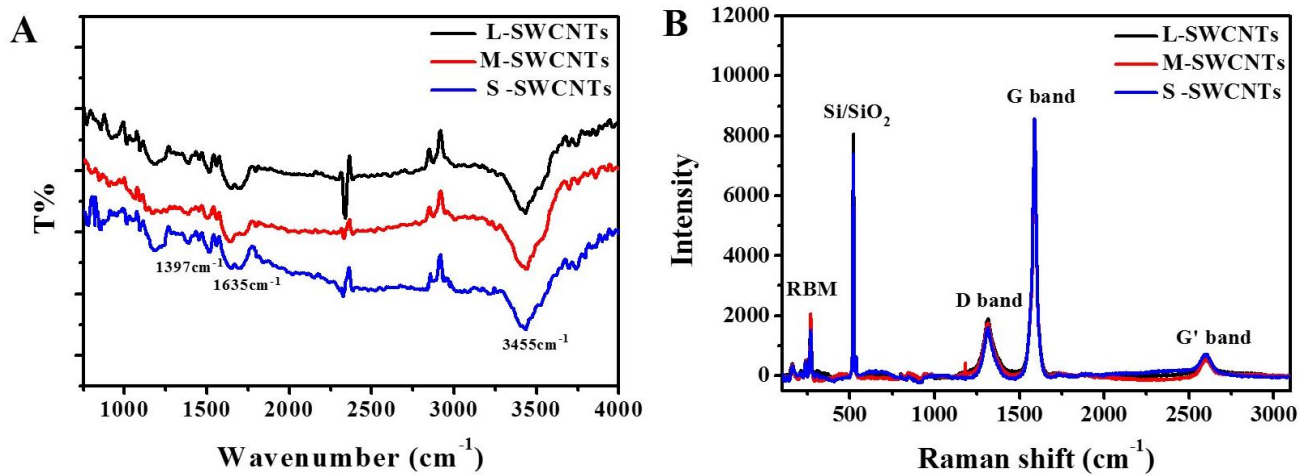

**Supplementary Figure S1. Characterization of SWCNTs.** (A) FT-IR spectra of SWCNTs. (B)

Typical Raman spectra of SWCNTs.

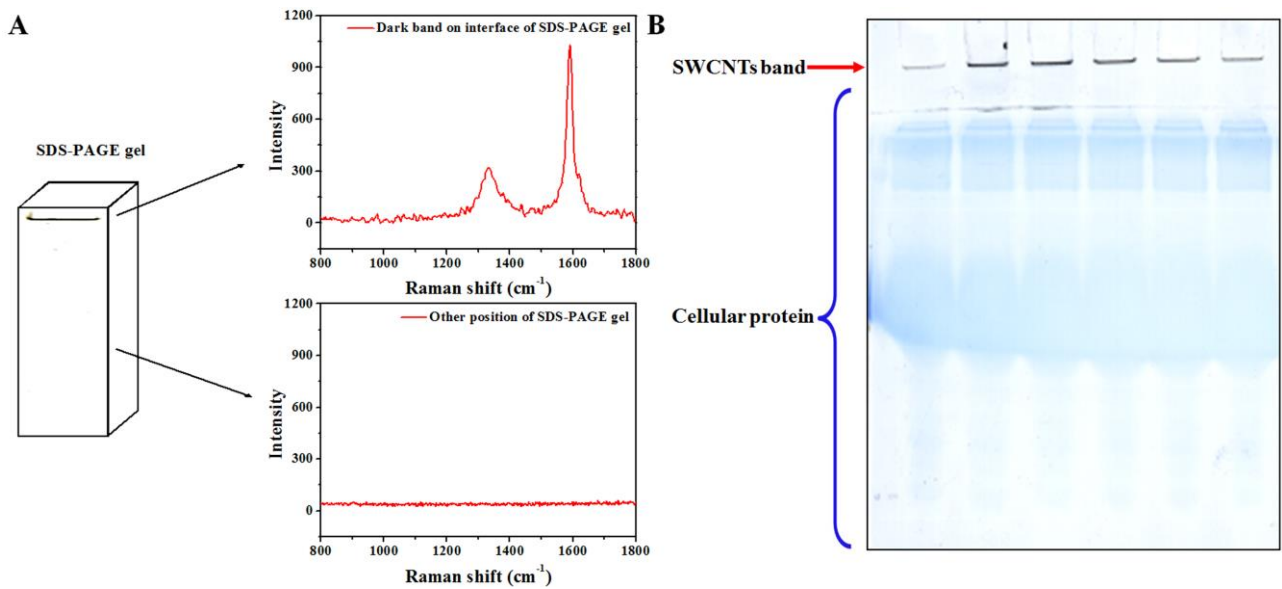

**Supplementary Figure S2. Raman detection of SWCNTs and Coomassie blue staining. (A)**

Raman spectroscopic analysis of an SDS-PAGE gel loaded with 20  $\mu\text{L}$  of cell lysates after exposure to 10  $\mu\text{g}/\text{mL}$  SWCNTs following electrophoresis at 120 V for 2 h. Raman spectra were acquired from various positions (Y axis 20 points, z axis 50 points, total 1000 points) on and below the interface of the stacking gel and the loading well. The plot of integrated Raman intensities from 1300  $\text{cm}^{-1}$  to 2000  $\text{cm}^{-1}$ , representing the D-band (1347  $\text{cm}^{-1}$ ) and G-band (1594  $\text{cm}^{-1}$ ) resonance of SWCNTs. Up-panel represented D- and G-resonance of the dark band in the interface. Lower-panel showed no D- and G-resonance of SWCNTs which indicated that SWCNTs were not found elsewhere, which verified the reliability of SDS-PAGE method. (B) Coomassie blue staining of the gel showing that SWCNTs were deposited in loading wells and were separated from cellular proteins.

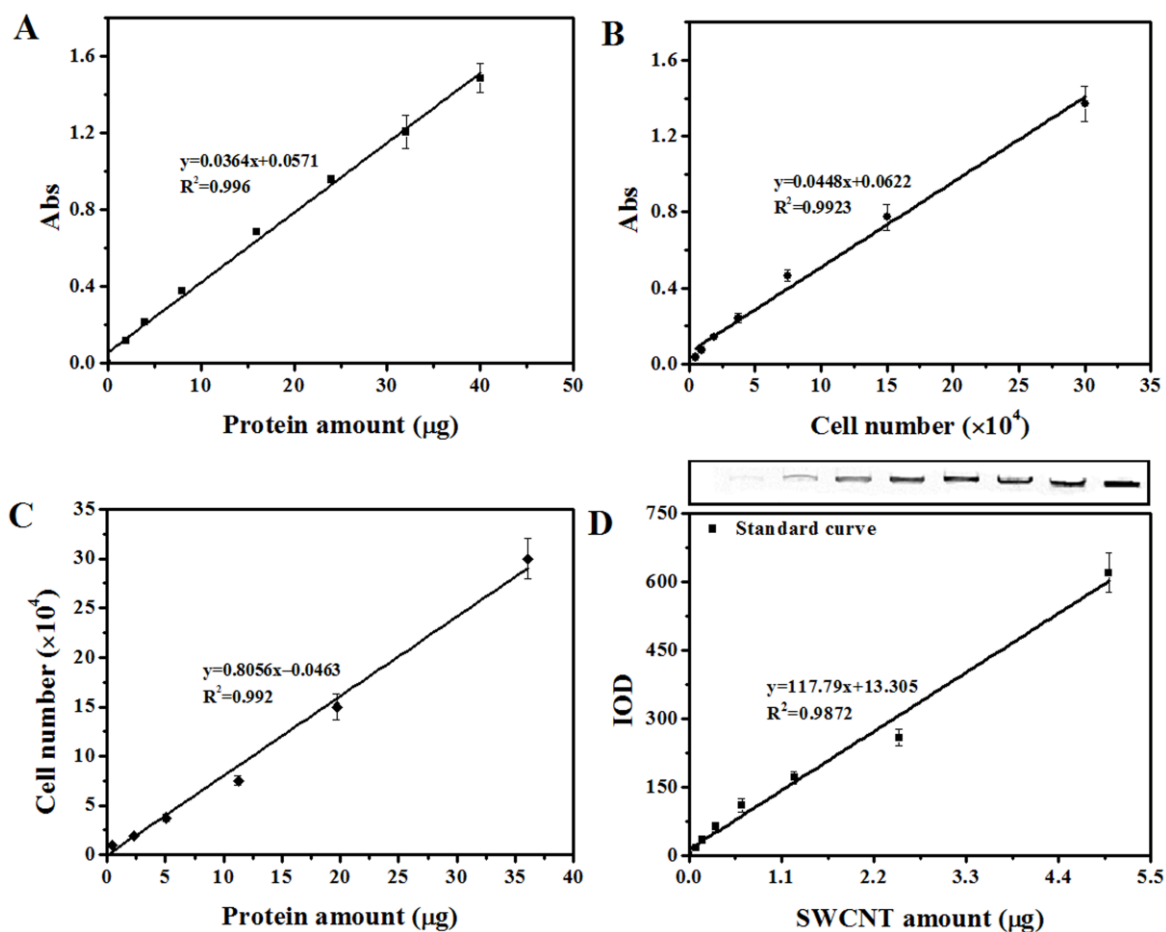

**Supplementary Figure S3. A series of standard curves for quantifying SWCNTs amount per cell.** (A) Standard curve of protein amount and absorbance (Abs), as measured by BCA method. (B) Standard curve of cell number and absorbance. (C) Standard curve of protein amount and cell number ( $R^2 = 0.992$ ). (D) A series of concentrations of SWCNTs (total volume was  $20 \mu\text{L}$  for each well) were loaded into wells. IOD (intensity of dark band) intensity is proportional to the amount of SWCNTs in each well ( $R^2 = 0.9872$ ). Each data point is the mean of three individual experiments. Error bars represent SEM. Up-panel showed corresponding representative SWCNTs bands in the gel image. Data are presented as mean  $\pm$  standard error of mean.

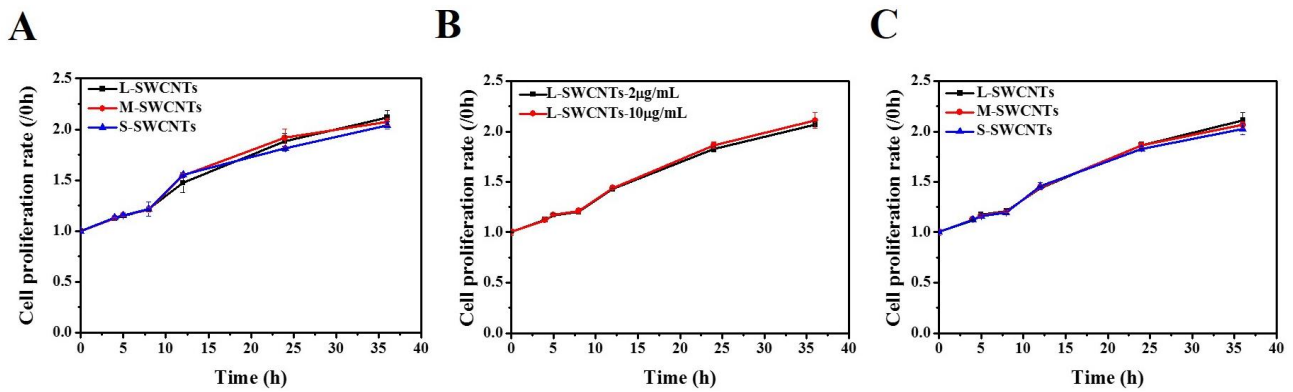

**Supplementary Figure S4. The cell proliferation over time, as determined by an automatic cell counter (Countess, Invitrogen).** (A) The proliferation rate of cell treated with L, M, and S-SWCNTs (10 µg/mL) for different time period. (B) The proliferation rate of cell treated with L-SWCNTs (2 and 10 µg/mL) for different time period after replacing SWCNTs exposure solutions with fresh medium at 5 h. (C) The proliferation rate of cell treated with L, M, and S-SWCNTs (10 µg/mL) for different time period after replacing SWCNTs exposure solutions with fresh medium at 5 h. After treatment, the cells (10 µL) were mixed with trypan blue reagent (10 µL) for 1 min, and the cell number were then measured by automatic cell counter (Countess, Invitrogen).

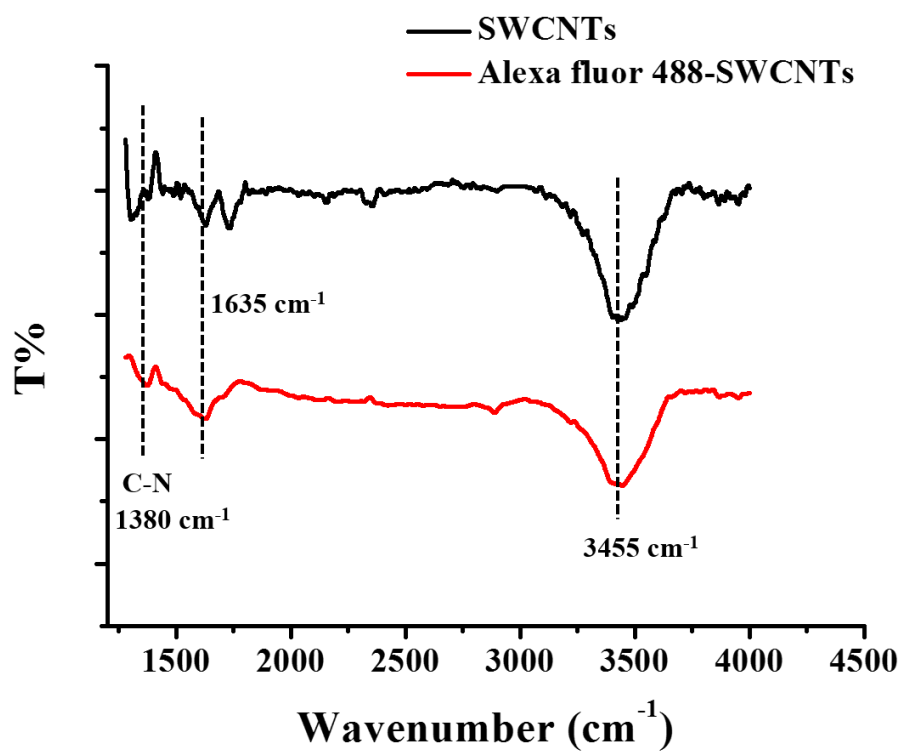

**Supplementary Figure S5.** FT-IR spectra of SWCNTs and Alexa fluor 488 conjugated SWCNTs.

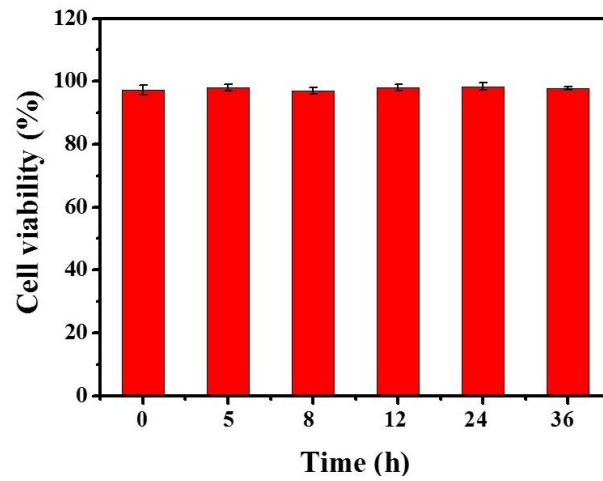

**Supplementary Figure S6.** The viability of cells treated with 10  $\mu\text{g/mL}$  L-SWCNTs at different time points after removing exposure solutions at 5 h, as determined by an automatic cell counter (Countess, Invitrogen). Data are presented as mean  $\pm$  standard error of mean.

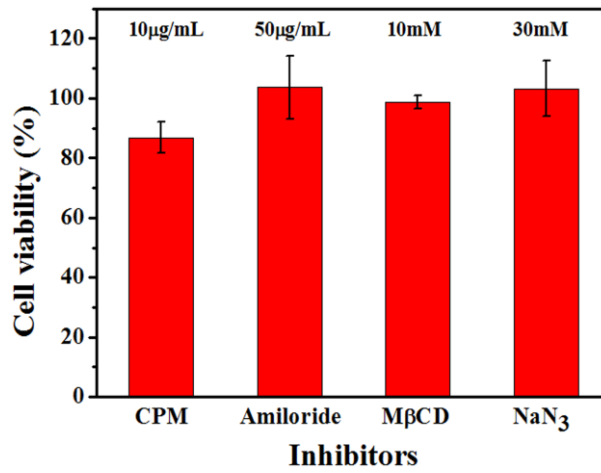

**Supplementary Figure S7.** The viability (Treatment/control) of cells treated with inhibitors for 4 h, as determined by WST-1 assay. Data are presented as mean  $\pm$  standard error of mean.
